# Supplementary material
Source: MDPI journal article supplement (https://www.mdpi.com/2071-1050/15/11/8714)
Supplement: s1 [file s1]

# Determination of Pesticide Residues in Olive Oil Using QuEChERS Extraction and Liquid Chromatography–Orbitrap High-Resolution Mass Spectrometry: Comparison of Different Clean-Up Sorbents and Validation Study

Konstantina Iosif <sup>1</sup> and Ioannis Konstantinou <sup>1,2,\*</sup>

<sup>1</sup> Department of Chemistry, University of Ioannina, 45110 Ioannina, Greece; iokonstantina97@gmail.com

<sup>2</sup> Institute of Environment and Sustainable Development, University Research Center of Ioannina (URCI), 45110 Ioannina, Greece

\* Correspondence: iokonst@uoi.gr; Tel.: +30-2651008349

## Supplementary information

**Table S1.** Operational parameters of LTQ-FT Orbitrap instrument.

| Full scan                        |                                      |
|----------------------------------|--------------------------------------|
| Mass range                       | 120-1000Da                           |
| Spray voltage                    | 3,7 kV                               |
| Resolution                       | 60.000 FWHM                          |
| Sheath gas                       | 40 au                                |
| Auxiliary gas flow               | 15au                                 |
| Capillary temperature            | 320 °C                               |
| Collision energy                 | 45 Ev                                |
| Mass tolerance                   | <5mg/L                               |
| Data dependent scanning          |                                      |
| Fragmentation technique          | CID (collision induced dissociation) |
| Normalized collision energy, NCE | 35%                                  |
| Resolution                       | 15000                                |
| Data processing software         | Thermo Xcalibur 2.1                  |

**Table S2.** LC–HR-MS elution program

| Time<br>(min) | %A<br>(H <sub>2</sub> O,0,1% FA) | %B<br>(MeOH,0,1% FA) | Flow rate<br>(μL min <sup>-1</sup> ) |
|---------------|----------------------------------|----------------------|--------------------------------------|
| 0             | 70                               | 30                   | 250                                  |
| 1             | 70                               | 30                   | 250                                  |
| 2             | 30                               | 70                   | 250                                  |
| 5             | 0                                | 100                  | 250                                  |

|      |    |     |     |
|------|----|-----|-----|
| 7    | 0  | 100 | 250 |
| 7,10 | 70 | 30  | 250 |
| 10   | 70 | 30  | 250 |

**Table S3.** LC-MS analytical characteristics of the studied pesticides.

| Pesticides     | Class       | Ion formula<br>[M+H] <sup>+</sup>                                             | Theoretical<br>mass (m/z) | Experimental mass<br>(m/z) | t <sub>R</sub><br>(min) | Error<br>(Δ ppm) | RDBE | Daughter<br>ions 35%<br>NCE                     |
|----------------|-------------|-------------------------------------------------------------------------------|---------------------------|----------------------------|-------------------------|------------------|------|-------------------------------------------------|
| Alachlor       | Herbicide   | C <sub>14</sub> H <sub>21</sub> ClNO <sub>2</sub>                             | 270.1255                  | 270.1247                   | 4.72                    | -2.973           | 4.5  | 238.0987,<br>162.1273                           |
| Azoxystrobin   | Fungicide   | C <sub>22</sub> H <sub>18</sub> N <sub>3</sub> O <sub>5</sub>                 | 404.1241                  | 404.1232                   | 4.13                    | -2.220           | 15.5 | 372.0964,<br>345.1200                           |
| Benalaxyl      | Fungicide   | C <sub>20</sub> H <sub>24</sub> NO <sub>3</sub>                               | 326.1751                  | 326.1743                   | 5.07                    | -2.300           | 9.5  | 294.1482,<br>208.1328,<br>266.1536,<br>148.1117 |
| Boscalid       | Fungicide   | C <sub>18</sub> H <sub>13</sub> Cl <sub>2</sub> N <sub>2</sub> O              | 343.0399                  | 343.0391                   | 4.29                    | -2.580           | 12.5 | 307.0624,<br>139.9893                           |
| Chlorfenviphos | Insecticide | C <sub>12</sub> H <sub>15</sub> Cl <sub>3</sub> O <sub>4</sub> P              | 358.9758                  | 358.9762                   | 5.05                    | -1.769           | 4.5  | 115.0462,<br>127.0149,<br>98.9835               |
| Chlorpyrifos   | Insecticide | C <sub>9</sub> H <sub>12</sub> Cl <sub>3</sub> NO <sub>3</sub> PS             | 349.9336                  | 349.9328                   | 3.50                    | -2.086           | 3.5  | 321.9015,<br>293.8702,<br>197.9270,<br>275.8604 |
| Diazinon       | Insecticide | C <sub>12</sub> H <sub>22</sub> N <sub>2</sub> O <sub>3</sub> PS              | 305.1083                  | 305.1078                   | 5.11                    | -1.856           | 3.5  | 169.0789,<br>153.1017,<br>277.0762,<br>249.0447 |
| Difenoconazole | Fungicide   | C <sub>19</sub> H <sub>18</sub> Cl <sub>2</sub> N <sub>3</sub> O <sub>3</sub> | 406.0720                  | 406.0713                   | 5.48                    | -1.609           | 11.5 | 337.0386,<br>251.0020                           |
| Dimethoate     | Insecticide | C <sub>5</sub> H <sub>13</sub> NO <sub>3</sub> PS <sub>2</sub>                | 230.0069                  | 230.0063                   | 2.85                    | -2.381           | 0.5  | 198.9641,<br>170.9692                           |
| Diuron         | Herbicide   | C <sub>9</sub> H <sub>11</sub> Cl <sub>12</sub> N <sub>2</sub> O              | 233.0243                  | 233.0238                   | 4.03                    | -2.210           | 4.5  | 187.1477,<br>159.0798                           |
| Deltamethin    | Insecticide | C <sub>22</sub> H <sub>23</sub> Br <sub>2</sub> NO <sub>3</sub>               | 523.0051                  | 523.0030                   | 6.67                    | -0.0021          | 13   | 304.1321                                        |
| Fenbuconazole  | Fungicide   | C <sub>19</sub> H <sub>18</sub> ClN <sub>4</sub>                              | 337.1215                  | 337.1205                   | 4.78                    | -2.880           | 12.5 | 194.0475,<br>125.0148                           |
| Fenoxycarb     | Insecticide | C <sub>17</sub> H <sub>20</sub> NO <sub>4</sub>                               | 302.1387                  | 302.1381                   | 4.82                    | -2.034           | 8.5  | 116.0699,<br>256.0959                           |

Table S3. (continue)

| Pesticides             | Class       | Ion formula<br>[M+H] <sup>+</sup>                                              | Theoretical<br>mass (m/z) | Experimental<br>mass (m/z) | t <sub>R</sub><br>(min) | Error<br>(Δppm) | RDBE | Daughter<br>ions 35%<br>NCE                     |
|------------------------|-------------|--------------------------------------------------------------------------------|---------------------------|----------------------------|-------------------------|-----------------|------|-------------------------------------------------|
| Florasulam             | Herbicide   | C <sub>12</sub> H <sub>9</sub> F <sub>3</sub> N <sub>5</sub> O <sub>3</sub> S  | 360.0373                  | 360.0364                   | 3.19                    | -2.364          | 9.5  | 327.1191,<br>129.0378,<br>191.9919,<br>296.0743 |
| Fluquinconazole        | Fungicide   | C <sub>16</sub> H <sub>9</sub> Cl <sub>2</sub> FN <sub>5</sub> O               | 376.0163                  | 376.0152                   | 4.59                    | -2.979          | 13.5 | 349.0043,<br>306.9825                           |
| Iodosulfuron<br>methyl | Herbicide   | C <sub>14</sub> H <sub>14</sub> IN <sub>5</sub> NaO <sub>6</sub> S             | 529.9602                  | 529.9587                   | 4.00                    | -2.864          | 9.5  | 389.8889                                        |
| Imazalil               | Fungicide   | C <sub>14</sub> H <sub>15</sub> Cl <sub>2</sub> N <sub>2</sub> O               | 297.0556                  | 297.0550                   | 3.82                    | -1.970          | 7.5  | 255.0078,<br>158.9757,<br>176.0382,<br>109.0754 |
| Isoproturon            | Herbicide   | C <sub>12</sub> H <sub>19</sub> N <sub>2</sub> O                               | 207.1492                  | 207.1489                   | 3.98                    | -1.254          | 4.5  | 165.1015,<br>162.0906                           |
| Kresoxim-<br>methyl    | Fungicide   | C <sub>18</sub> H <sub>20</sub> NO <sub>4</sub>                                | 314.1387                  | 314.1382                   | 4.91                    | -1.670          | 9.5  | 267.1008,<br>282.1110,<br>222.0910              |
| Metalaxyl              | Fungicide   | C <sub>15</sub> H <sub>22</sub> NO <sub>4</sub>                                | 280.1543                  | 280.1539                   | 3.96                    | -1.552          | 5.5  | 248.1274,<br>220.1326,<br>192.1378              |
| Myclobutanil           | Fungicide   | C <sub>15</sub> H <sub>18</sub> ClN <sub>4</sub>                               | 289.1215                  | 289.1208                   | 4.49                    | -2.182          | 8.5  | 220.0880,<br>125.0151                           |
| Mefenpyr-<br>diethyl   | Herbicide   | C <sub>16</sub> H <sub>19</sub> Cl <sub>2</sub> N <sub>2</sub> O <sub>4</sub>  | 373.0716                  | 373.0706                   | 5.11                    | -2.651          | 7.5  | 299.0573,<br>327.0518                           |
| Nicosulfuron           | Herbicide   | C <sub>15</sub> H <sub>19</sub> N <sub>6</sub> O <sub>6</sub> S                | 411.1081                  | 411.1070                   | 3.53                    | -2.772          | 9.5  | 366.0491,<br>213.0322,<br>182.0554,<br>156.0764 |
| Pirimicarb             | Insecticide | C <sub>11</sub> H <sub>19</sub> N <sub>4</sub> O <sub>2</sub>                  | 239.1503                  | 239.1496                   | 3.54                    | -2.561          | 4.5  | 182.1282,<br>195.1597,<br>239.1496              |
| Penoxsulam             | Herbicide   | C <sub>16</sub> H <sub>15</sub> F <sub>5</sub> N <sub>5</sub> O <sub>5</sub> S | 484.0709                  | 484.0694                   | 3.64                    | -3.009          | 9.5  | 444.0567,<br>195.0744,<br>464.0629              |

|                |             |                                                                 |          |          |      |        |     |                       |
|----------------|-------------|-----------------------------------------------------------------|----------|----------|------|--------|-----|-----------------------|
| <b>Phosmet</b> | Insecticide | C <sub>11</sub> H <sub>13</sub> NO <sub>4</sub> PS <sub>2</sub> | 318.0018 | 318.0011 | 4.12 | -2.146 | 6.5 | 160.0387,<br>133.0280 |
|----------------|-------------|-----------------------------------------------------------------|----------|----------|------|--------|-----|-----------------------|

**Table S3.** (continue)

| Pesticides                | Class       | Ion formula<br>[M+H] <sup>+</sup>                                              | Theoretical<br>mass (m/z) | Experimental<br>mass (m/z) | t <sub>R</sub><br>(min) | Error<br>(Δppm) | RDBE | Daughter<br>ions 35%<br>NCE        |
|---------------------------|-------------|--------------------------------------------------------------------------------|---------------------------|----------------------------|-------------------------|-----------------|------|------------------------------------|
| <b>Pyriproxyfen</b>       | Insecticide | C <sub>20</sub> H <sub>20</sub> NO <sub>3</sub>                                | 322.1438                  | 322.1429                   | 5.97                    | -2.763          | 11.5 | 227.1061,<br>136.0751,<br>96.0438  |
| <b>Pyraclostrobin</b>     | Fungicide   | C <sub>19</sub> H <sub>19</sub> ClN <sub>3</sub> O <sub>4</sub>                | 388.1059                  | 388.1049                   | 5.15                    | -2.345          | 11.5 | 194.0805,<br>296.0576,<br>164.0701 |
| <b>Quizalofop-p-ethyl</b> | Herbicide   | C <sub>19</sub> H <sub>18</sub> ClN <sub>2</sub> O <sub>4</sub>                | 373.0950                  | 373.0945                   | 5.68                    | -1.129          | 11.5 | 299.0573                           |
| <b>Spinetoram</b>         | Insecticide | C <sub>42</sub> H <sub>70</sub> NO <sub>10</sub>                               | 748.4994                  | 748.4992                   | 5.58                    | -0.286          | 8.5  | 688.0282                           |
| <b>Spirotetramat</b>      | Insecticide | C <sub>21</sub> H <sub>28</sub> NO <sub>5</sub>                                | 374.1962                  | 374.1953                   | 4.56                    | -2.297          | 8.5  | 330.2054,<br>302.1745,<br>270.1485 |
| <b>Terbutylazine</b>      | Herbicide   | C <sub>9</sub> H <sub>17</sub> ClN <sub>5</sub>                                | 230.1167                  | 230.1162                   | 4.34                    | -1.998          | 3.5  | 174.0537                           |
| <b>Trifloxystrobin</b>    | Fungicide   | C <sub>20</sub> H <sub>20</sub> F <sub>3</sub> N <sub>2</sub> O <sub>4</sub>   | 409.1370                  | 409.1362                   | 5.39                    | -1.951          | 10.5 | 186.0521                           |
| <b>Thiabendazole</b>      | Fungicide   | C <sub>10</sub> H <sub>8</sub> N <sub>3</sub> S                                | 202.0433                  | 202.0427                   | 2.69                    | -3.289          | 8.5  | 202.0425,<br>175.0318              |
| <b>Thiamethoxam</b>       | Insecticide | C <sub>8</sub> H <sub>11</sub> ClN <sub>5</sub> O <sub>3</sub> S               | 292.0266                  | 292.0258                   | 1.91                    | -2.548          | 5.5  | 211.0641,<br>246.0329              |
| <b>Tebuconazole</b>       | Fungicide   | C <sub>16</sub> H <sub>23</sub> ClN <sub>3</sub> O                             | 308.1524                  | 308.1517                   | 5.01                    | -2.228          | 6.5  | 308.0031                           |
| <b>Thiacloprid</b>        | Insecticide | C <sub>10</sub> H <sub>10</sub> ClN <sub>4</sub> S                             | 253.0309                  | 253.0305                   | 3.24                    | -1.863          | 7.5  | 126.0100,<br>186.0134,<br>226.0194 |
| <b>Tribenuron-methyl</b>  | Herbicide   | C <sub>15</sub> H <sub>18</sub> N <sub>5</sub> O <sub>6</sub> S                | 396.0972                  | 396.0962                   | 3.87                    | -2.652          | 9.5  | 155.0922,<br>364.0698,<br>199.0053 |
| <b>λ-cyhalothrin</b>      | Insecticide | C <sub>23</sub> H <sub>23</sub> ClF <sub>3</sub> N <sub>2</sub> O <sub>3</sub> | 467.1344                  | 467.1334                   | 6.20                    | -2.101          | 11.5 | 226.0854,<br>450.1074              |

**Table S4.** Calibration curve equation and correlation coefficient factor ( $r^2$ ) of the compared protocols.

| Pesticides             | EMR-lipid                                   |                               |        | Z-Sep <sup>+</sup>                          |                               |        |
|------------------------|---------------------------------------------|-------------------------------|--------|---------------------------------------------|-------------------------------|--------|
|                        | Concentration<br>range ( $\mu\text{g/kg}$ ) | Calibration curve<br>equation | $r^2$  | Concentration<br>range ( $\mu\text{g/kg}$ ) | Calibration curve<br>equation | $r^2$  |
| Alachlor               | 5-500                                       | $y = 124560x + 804357$        | 0.9906 | 5-500                                       | $y = 135004x + 668460$        | 0.9968 |
| Azoxystrobin           | 5-500                                       | $y = 603222x - 1537979$       | 0.9993 | 5-500                                       | $y = 562263x + 2701010$       | 0.9973 |
| Benalaxyl              | 5-500                                       | $y = 737851x + 5232620$       | 0.9980 | 5-500                                       | $y = 757938x + 5635450$       | 0.9959 |
| Boscalid               | 5-500                                       | $y = 88184.9x + 417036$       | 0.9936 | 5-500                                       | $y = 93402.1x + 336783$       | 0.9969 |
| Chlorfenviphos         | 5-500                                       | $y = 221608x + 1600880$       | 0.9967 | 5-500                                       | $y = 235514x + 1731910$       | 0.9932 |
| Chlorpyrifos           | 5-500                                       | $y = 69066.9x + 17848$        | 0.9956 | 5-500                                       | $y = 65190.9x - 325777$       | 0.9979 |
| Diazinon               | 5-500                                       | $y = 484532x + 3880110$       | 0.9989 | 5-500                                       | $y = 493036x + 4450710$       | 0.9967 |
| Difenoconazole         | 5-500                                       | $y = 159341x + 414814$        | 0.9943 | 5-500                                       | $y = 160944x + 333097$        | 0.9989 |
| Dimethoate             | 5-500                                       | $y = 377218x - 753254$        | 0.9986 | 5-500                                       | $y = 409475x + 1662440$       | 0.9989 |
| Diuron                 | 5-500                                       | $y = 179021x - 309348$        | 0.9994 | 5-500                                       | $y = 169614x + 1821490$       | 0.9922 |
| Deltamethin            | 5-500                                       | $y = 68930.1x - 505005$       | 0.9942 | 5-500                                       | $y = 72635x - 432389$         | 0.9985 |
| Fenbuconazole          | 5-500                                       | $y = 135721x + 938941$        | 0.9908 | 5-500                                       | $y = 140389x + 744523$        | 0.9969 |
| Fenoxycarb             | 5-500                                       | $y = 293789x + 205782$        | 0.9998 | 5-500                                       | $y = 247900x + 3255170$       | 0.9916 |
| Florasulam             | 5-500                                       | $y = 58991.6x - 591385$       | 0.9968 | 5-500                                       | $y = 77664.1x - 549336$       | 0.9996 |
| Fluquinconazole        | 5-500                                       | $y = 16466.9x - 20846$        | 0.9919 | 5-500                                       | $y = 17970.3x - 111375$       | 0.9994 |
| Iodosulfuron<br>methyl | 5-500                                       | $y = 6752.52x + 9302.52$      | 0.9988 | 5-500                                       | $y = 8179.83x + 54011.2$      | 0.9918 |
| Imazalil               | 5-500                                       | $y = 400326x - 1346460$       | 0.9989 | 5-500                                       | $y = 375994x + 4153590$       | 0.9936 |
| Isoproturon            | 5-500                                       | $y = 546296x + 579244$        | 0.9996 | 5-500                                       | $y = 505525x + 7375950$       | 0.9924 |
| Kresoxim-<br>methyl    | 5-500                                       | $y = 357156x + 920650$        | 0.9995 | 5-500                                       | $y = 304773x + 4523270$       | 0.9917 |
| Metalaxyl              | 5-500                                       | $y = 596400x + 664695$        | 0.9995 | 5-500                                       | $y = 546209x + 7461990$       | 0.9944 |
| Myclobutanil           | 5-500                                       | $y = 146017x + 914948$        | 0.9916 | 5-500                                       | $y = 152531x + 468150$        | 0.9981 |
| Mefenpyr-<br>diethyl   | 5-500                                       | $y = 291451x + 3000970$       | 0.9938 | 5-500                                       | $y = 307398x + 3081860$       | 0.9904 |
| Nicosulfuron           | 5-500                                       | $y = 94620.3x - 622363$       | 0.9964 | 5-500                                       | $y = 121555x - 410348$        | 0.9996 |
| Pirimicarb             | 5-500                                       | $y = 447556x - 1670240$       | 0.9990 | 5-500                                       | $y = 548036x + 5141760$       | 0.9970 |
| Penoxsulam             | 5-500                                       | $y = 146087x - 644206$        | 0.9958 | 5-500                                       | $y = 172535x - 562109$        | 0.9992 |
| Phosmet                | 5-500                                       | $y = 186207x - 592556$        | 0.9995 | 5-500                                       | $y = 171776x + 894584$        | 0.9955 |
| Pyriproxyfen           | 5-500                                       | $y = 647790x - 582780$        | 0.9992 | 5-500                                       | $y = 518602x + 3446090$       | 0.9961 |
| Pyraclostrobin         | 5-500                                       | $y = 413832x + 1754580$       | 0.9989 | 5-500                                       | $y = 431273x + 1939070$       | 0.9974 |
| Quizalofop-p-<br>ethyl | 5-500                                       | $y = 415488x - 619015$        | 0.9997 | 5-500                                       | $y = 366045x + 3167820$       | 0.9938 |
| Spinetoram             | 5-500                                       | $y = 283223x + 1615790$       | 0.9907 | 5-500                                       | $y = 285220x + 1947550$       | 0.9962 |
| Spirotetramat          | 5-500                                       | $y = 349358x + 2919690$       | 0.9911 | 5-500                                       | $y = 360465x + 1654900$       | 0.9981 |
| Terbutylazine          | 5-500                                       | $y = 351632x - 67717.7$       | 0.9994 | 5-500                                       | $y = 306786x + 3201460$       | 0.9954 |
| Trifloxystrobin        | 5-500                                       | $y = 687383x + 1591120$       | 0.9996 | 5-500                                       | $y = 587443x + 8106970$       | 0.9918 |
| Thiabendazole          | 5-500                                       | $y = 462727x + 297572$        | 0.9952 | 5-500                                       | $y = 549922x + 609410$        | 0.9990 |

**Table S4.** (continue)

| Pesticides        | EMR-lipid                   |                            |                | Z-Sep <sup>+</sup>          |                            |                |
|-------------------|-----------------------------|----------------------------|----------------|-----------------------------|----------------------------|----------------|
|                   | Concentration range (µg/kg) | Calibration curve equation | r <sup>2</sup> | Concentration range (µg/kg) | Calibration curve equation | r <sup>2</sup> |
| Thiamethoxam      | 5-500                       | y = 143301x - 1283700      | 0.9955         | 5-500                       | y = 145286x - 734395       | 0.9994         |
| Tebuconazole      | 5-500                       | y = 114033x + 1358240      | 0.9967         | 5-500                       | y = 118655x + 1558350      | 0.9922         |
| Thiacloprid       | 5-500                       | y = 205644x - 1677590      | 0.9966         | 5-500                       | y = 309387x + 1090420      | 0.9975         |
| Tribenuron-methyl | 5-500                       | y = 221921x - 1219980      | 0.9978         | 5-500                       | y = 238735x + 1409400      | 0.9941         |
| λ-cyhalothrin     | 5-500                       | y = 53377.4x - 379668      | 0.9974         | 5-500                       | y = 41603.3x + 51985       | 0.9973         |

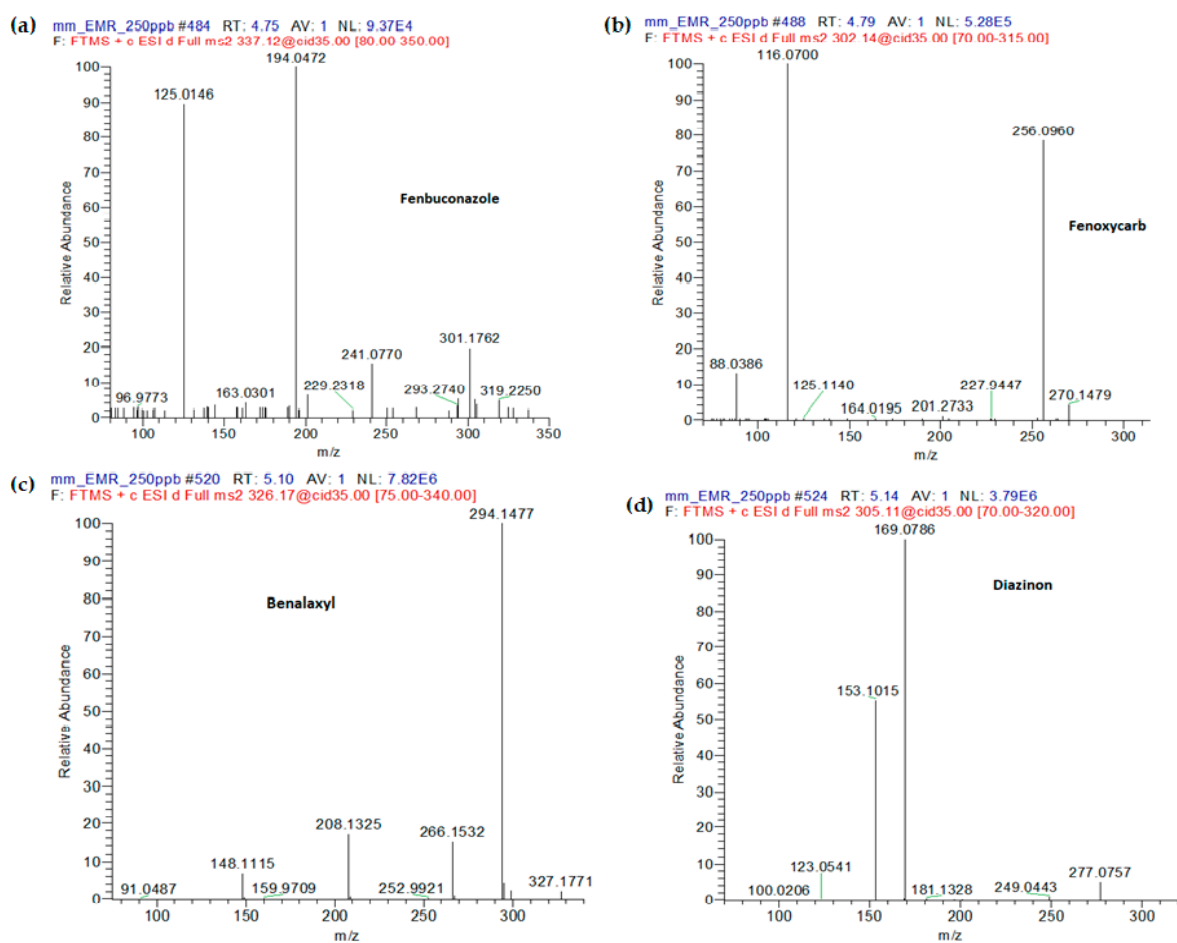

Figure S1. Representative MS/MS spectrum of pesticide analytes with close retention times.
